# Supplementary material for: Cellular uptake mechanisms of functionalised multi-walled carbon nanotubes by 3D electron tomography imaging
Source: Royal Society of Chemistry journal article supplement (doi:10.1039/c1nr10080g), 2011-01-01
Supplement: c1nr10080g.pdf [file c1nr10080g.pdf]

# **Cellular Uptake Mechanisms of Functionalised Multi-Walled Carbon Nanotubes by 3D Electron Tomography Imaging**

Khuloud T. Al-Jamal, Hannah Nerl, Karin H. Müller, Hanene Ali-Boucetta, Shouping Li, Peter D. Hanes, Joerg R. Jinschek, Maurizio Prato, Alberto Bianco, Kostas Kostarelos, Alexandra E. Porter

## **Supplementary Information**

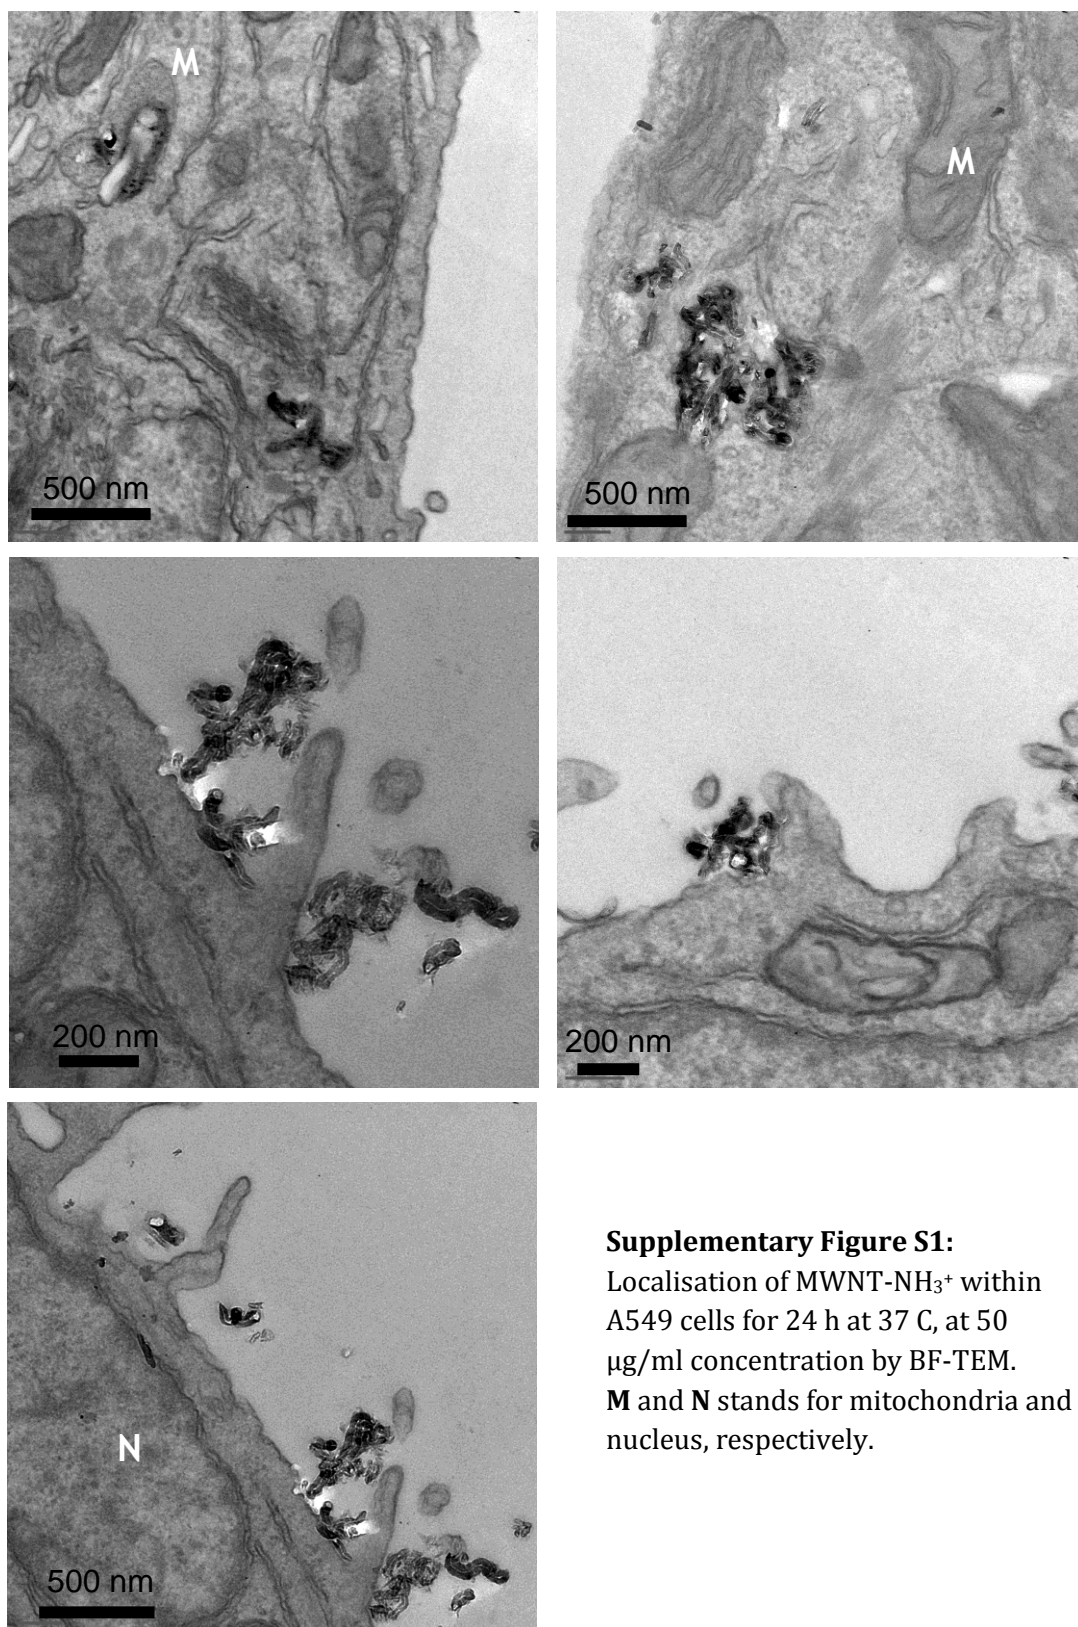

**Supplementary Figure S1:**

Localisation of MWNT-NH<sub>3</sub><sup>+</sup> within A549 cells for 24 h at 37 C, at 50 µg/ml concentration by BF-TEM.

**M** and **N** stands for mitochondria and nucleus, respectively.
